# Supplementary material
Source: PubMed Central journal article supplement (PMC5681863)
Supplement: NIHMS74517-supplement-SI.pdf [file NIHMS74517-supplement-SI.pdf]

# Supporting Information

## **Spectrophotometric Quantification of Horseradish Peroxidase (HRP) with *p*-Phenylenediamine for Analyzing Peroxidase-encapsulating Lipid Vesicles (Liposomes)**

Ya Zhang,<sup>1,3,a</sup> Yannick R. F. Schmid,<sup>2,a</sup> Sandra Luginbühl,<sup>1</sup> Qiang Wang,<sup>3</sup> Petra S. Dittrich,<sup>2</sup> and Peter Walde<sup>1,\*</sup>

<sup>1</sup> Polymer Chemistry Group, Department of Materials (D-MATL), ETH Zürich, Vladimir-Prelog-Weg 5, CH-8093 Zürich, Switzerland

<sup>2</sup> Bioanalytics Group, Department of Biosystems Science and Engineering (D-BSSE), ETH Zürich, Vladimir-Prelog-Weg 3, CH-8093 Zürich, Switzerland

<sup>3</sup> Key Laboratory of Science and Technology of Eco-Textile, Jiangnan University, Wuxi 214122, Jiangsu, China

<sup>a</sup>: equal contributions

CONTENT INFORMATION: This Supporting Information contains additional experimental details and additional data for the assay of horseradish peroxidase (HRP) with *p*-phenylenediamine (PPD) and on the preparation and analysis of HRP-encapsulating lipid vesicles.

## TABLE OF CONTENTS

|                                                                                                                                      |      |
|--------------------------------------------------------------------------------------------------------------------------------------|------|
| Spectrophotometric Monitoring of the Reaction of PPD after Addition of HRP and H <sub>2</sub> O <sub>2</sub>                         | S-3  |
| Preparation of HRP-encapsulating POPC LUV <sub>200</sub> Suspensions                                                                 | S-4  |
| Quantification of POPC in the Vesicle Fractions                                                                                      | S-6  |
| Effect of Sodium Cholate on POPC Vesicle Turbidity and HRP Activity                                                                  | S-7  |
| Calibration Curves for Free HRP Measured with ABTS <sup>2-</sup> / H <sub>2</sub> O <sub>2</sub> without and with Cholate            | S-8  |
| Activity of <i>Fraction 16</i> Measured with ABTS <sup>2-</sup> / H <sub>2</sub> O <sub>2</sub> without and with Cholate             | S-10 |
| Michaelis-Menten Kinetics of Free HRP Measured with ABTS <sup>2-</sup> / H <sub>2</sub> O <sub>2</sub>                               | S-11 |
| Calibration Curves for Free HRP Measured with PPD / H <sub>2</sub> O <sub>2</sub> without and with Cholate                           | S-12 |
| Activity of <i>Fraction 15</i> Measured with PPD / H <sub>2</sub> O <sub>2</sub> without and with Cholate                            | S-14 |
| Suggested Mechanism for the Formation of Bandrowski's Base from PPD and H <sub>2</sub> O <sub>2</sub>                                | S-15 |
| MS Support for the Formation of Bandrowski's Base from PPD and H <sub>2</sub> O <sub>2</sub>                                         | S-16 |
| HRP Activity Measurements of <i>Fractions 30-45</i> (Free HRP) with ABTS <sup>2-</sup> / H <sub>2</sub> O <sub>2</sub>               | S-17 |
| Control Measurements of "Empty" POPC LUV <sub>200</sub> with ABTS <sup>2-</sup> / H <sub>2</sub> O <sub>2</sub>                      | S-18 |
| Control Measurements of "Empty" POPC LUV <sub>200</sub> with PPD / H <sub>2</sub> O <sub>2</sub>                                     | S-19 |
| Quantification of POPC and HRP in Each Vesicle Fraction                                                                              | S-20 |
| DLS Measurements of Vesicle Fractions                                                                                                | S-21 |
| Simulation of the Uptake of PPD by POPC LUV <sub>200</sub>                                                                           | S-22 |
| Another Preparation of a HRP-encapsulating POPC LUV <sub>200</sub> Suspension                                                        | S-23 |
| Michaelis-Menten Kinetics of HRP Inside POPC LUV <sub>200</sub> Measured with PPD / H <sub>2</sub> O <sub>2</sub>                    | S-25 |
| Experiments Demonstrating the Release of Bandrowski's Base Formed Inside HRP-encapsulating POPC LUV <sub>200</sub> from the Vesicles | S-26 |
| References                                                                                                                           | S-27 |

## Spectrophotometric Monitoring of the Reaction of PPD after Addition of HRP and H<sub>2</sub>O<sub>2</sub>

a

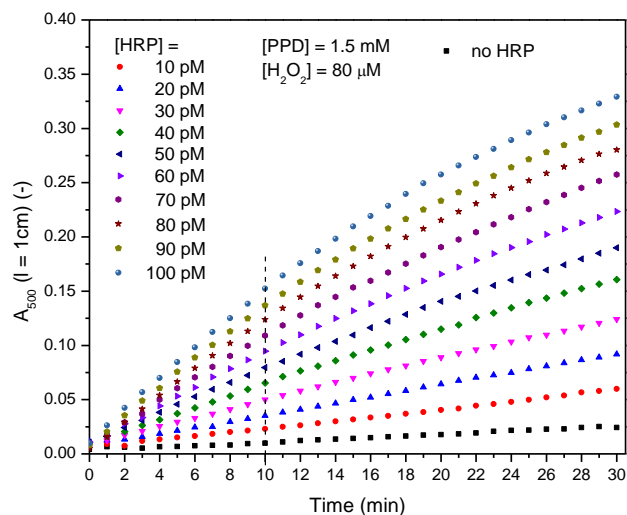

b

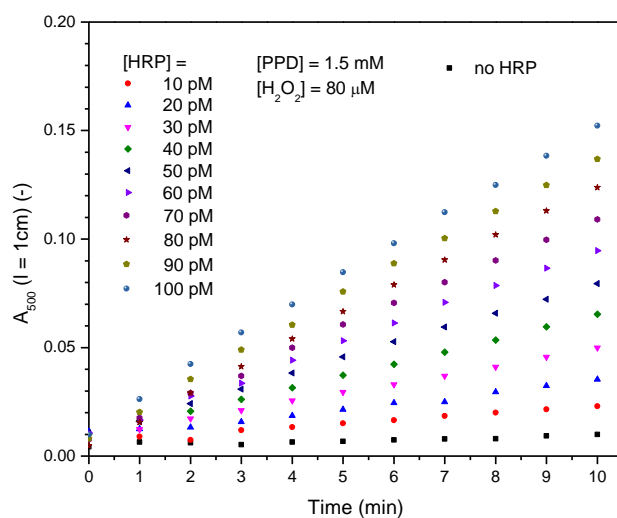

**Figure S-1.** Changes of  $A_{500}$ , the absorbance at  $\lambda_{iso} = 500$  nm of the assay solutions containing different HRP concentrations during the first 30 min (a) and 10 min (b) after H<sub>2</sub>O<sub>2</sub> addition with [PPD] = 1.5 mM and [H<sub>2</sub>O<sub>2</sub>] = 80 μM at pH 7.0 and  $\approx 25$  °C. The reaction solutions were incubated in a quartz cuvette with a path length of 1 cm. Buffer solution used: 0.1 M NaH<sub>2</sub>PO<sub>4</sub>/Na<sub>2</sub>HPO<sub>4</sub> (buffer-1).

## Preparation of HRP-encapsulating POPC LUV<sub>200</sub> Suspensions

*Dry POPC film formation.* At first, 30 mg POPC (40  $\mu$ mol), dissolved in 2 mL chloroform, were added to a 10 mL round bottom flask and dried by evaporating the solvent using a rotation evaporator with under-pressure (200 mbar) and a water bath warmed to 40 °C. The resulting lipid film was further dried *in vacuo* overnight at ~25 °C.

*POPC film hydration with an aqueous HRP solution.* HRP was dissolved in buffer-2 and diluted to a concentration of 62.6  $\mu$ M (determined spectrophotometrically), from which 1 mL (containing 62.6 nmol HRP) was added to the flask to disperse the POPC film at room temperature. The swelling process was promoted by gentle swirling and shaking the flask (lowest power on a bench-top vortex). After 15 min, most of the POPC was dispersed, resulting in a reddish milky suspension (which contained mostly multilamellar vesicles, MLV).<sup>S1,S2</sup> An additional 1 mL of buffer-2 was added to the flask to dilute the dense liposome-HRP mixture. The final 2 mL suspension (containing 62.6 nmol HRP and 40  $\mu$ mol POPC) was transferred into a 10 mL glass vial with screw-lid.

*POPC vesicle extrusion.* The 1.5 mL Extruder<sup>®</sup> from Lipex Biomembranes<sup>S3</sup> was used to decrease and homogenize the size and the lamellarity of the vesicles. The Extruder<sup>®</sup> was assembled with a 10 mm PE drain disc from Whatman and respective polycarbonate membranes. The vesicle suspension was first passed at room temperature 10 times through a 400 nm pore membrane, then 10 times through a 200 nm pore membrane (from Whatman). The obtained large unilamellar vesicles are abbreviated as LUV<sub>200</sub>. This suspension contained a mixture of HRP-encapsulating LUV<sub>200</sub> and free HRP in bulk solution.

*Separation by size-exclusion chromatography.* HRP-encapsulating POPC vesicles were separated from free HRP by size exclusion chromatography on Sepharose 4B, packed in a column of 35 cm in length and of an inner diameter of 1.1 cm. A volume of 0.5 mL of the LUV<sub>200</sub>-HRP mixture (containing 15.7 nmol HRP and 10  $\mu$ mol POPC) were applied onto the glass column and eluted with buffer-2, with a flow rate of 0.33 mL min<sup>-1</sup>, collecting fractions of 0.78 mL volume. The UV/VIS spectrum of each fraction was recorded and the measured absorbance at 275 nm ( $A_{275}$ ) and at 403 nm ( $A_{403}$ ) were plotted for each fraction to localize the vesicle fractions (*fractions 15-21*) and the fractions containing free HRP (*fractions 32-43*). The vesicle fractions were then analyzed by dynamic light scattering, and the concentration (amount) of POPC was determined in each fraction (see **Figure 5** and EXPERIMENTAL SECTION of the main text). Furthermore, the activity of HRP was determined in each fraction with ABTS<sup>2-</sup> (1.0 mM)/H<sub>2</sub>O<sub>2</sub> (0.2 mM) and PPD (1.0 mM)/H<sub>2</sub>O<sub>2</sub> (0.2 mM), see **Figure 5**.

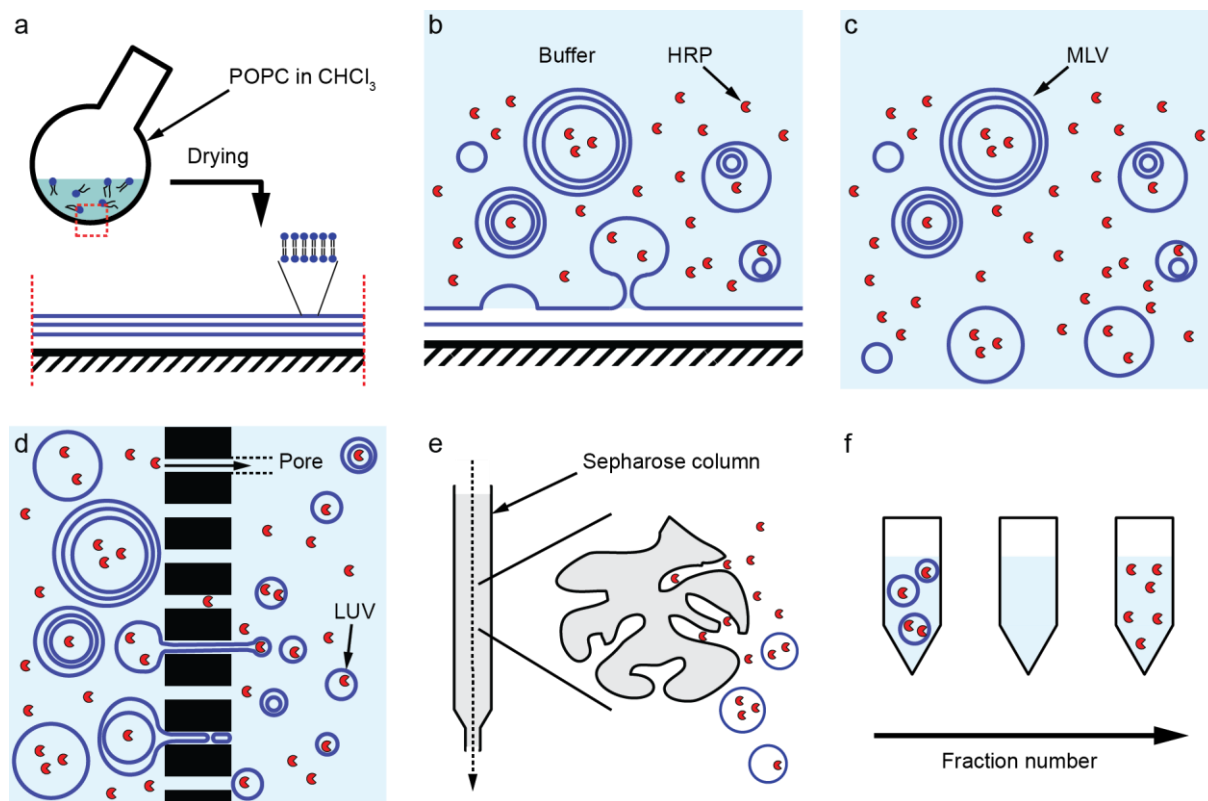

**Figure S-2.** Schematic of the preparation of HRP-encapsulating large unilamellar POPC vesicles: a) POPC was dried in a glass flask. b) The dried POPC film (40  $\mu\text{mol}$  POPC) was dispersed with HRP containing buffer (1.0 mL). c) Vesicles, mainly multilamellar vesicles (MLV), were formed. Some of the HRP was encapsulated. d) After dilution with buffer (1.0 mL), the vesicles were extruded through polycarbonate membranes, first with 400 nm and then with 200 nm pore membranes, resulting in LUV<sub>200</sub>. e) HRP-encapsulating LUV<sub>200</sub> were separated from free HRP by size exclusion chromatography on a Sepharose 4B column. f) A particle size dependent separation occurred, whereby HRP-encapsulating LUV<sub>200</sub> eluted before free HRP. Buffer solution used: 0.05 M  $\text{KH}_2\text{PO}_4/\text{K}_2\text{HPO}_4$  (buffer-2).

### Quantification of POPC in the Vesicle Fractions<sup>S4,S5</sup>

A 0.1 M ammonium ferrothiocyanate solution was prepared at room temperature by dissolving 27 g ferric chloride hexahydrate and 30.4 g ammonium thiocyanate in 1 L distilled water. For the calibration, a 0.1 mg mL<sup>-1</sup> POPC standard solution in chloroform was prepared. For the assay, a known volume of standard solution or sample was diluted in chloroform, 2 mL thereof were transferred to a 15 mL centrifugation tube. A volume of 2 mL of the ammonium ferrothiocyanate solution was added on top and the tube was vortexed, then centrifuged for phase separation with a Hermle Z320 K centrifuge at room temperature for 5 min at 300 g. The lower chloroform phase contained complexes between POPC and spectrophotometrically detectable ferrothiocyanate. The absorbance of the chloroform phase was measured, and  $A_{485}$  was used to quantify POPC, see **Figure S-3**.

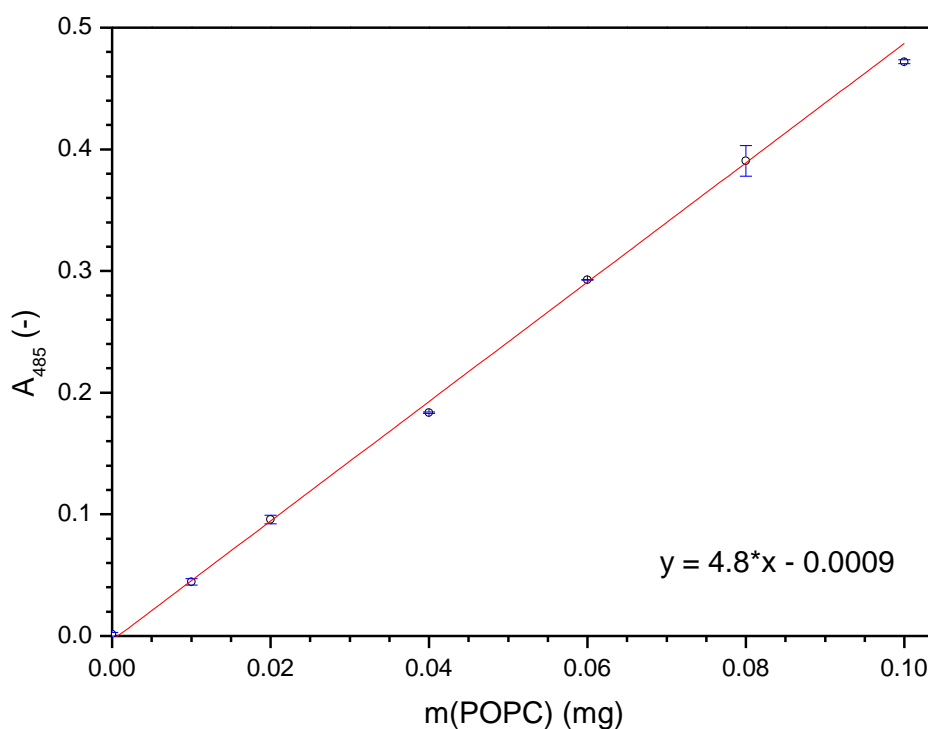

**Figure S-3.** Calibration curve for the quantification of POPC in the vesicle fractions. For the calibration, the mean absorbance at 485 nm ( $A_{485}$ ) was measured for different amounts of POPC using the Stewart assay at 25 °C. The error bars represent the standard deviations ( $n = 2$ ). Path length: 1.0 cm;  $r^2 = 0.9953$ . Molar mass of POPC,  $M(\text{POPC}) = 760 \text{ g mol}^{-1}$ , *i.e.*, 0.02 mg POPC correspond to 13.16 nmol POPC.

## Effect of Sodium Cholate on POPC Vesicle Turbidity and HRP Activity

At 8.0 mM cholate, the activity of 1.4 nM HRP was assessed with  $\text{ABTS}^{2-}/\text{H}_2\text{O}_2$  by measuring the oxidation of  $\text{ABTS}^{2-}$  (1.0 mM) in the presence of  $\text{H}_2\text{O}_2$  (0.2 mM) for the initial 150 s (**Figure S-4b**), see EXPERIMENTAL SECTION for details of the activity measurements. Compared to the activity in the absence of cholate, there was a decrease of about 10 %.<sup>S6</sup> Therefore, in the presence of 8.0 mM sodium cholate (i) there was a complete destruction of the vesicles, which is in good agreement with previous findings,<sup>S7</sup> and (ii) HRP was inactivated by only about 10 %. As a conclusion, for the determination of the total activity of vesicle-entrapped HRP and leaked HRP, cholate was added to the vesicle suspension to yield a final concentration of 8.0 mM.

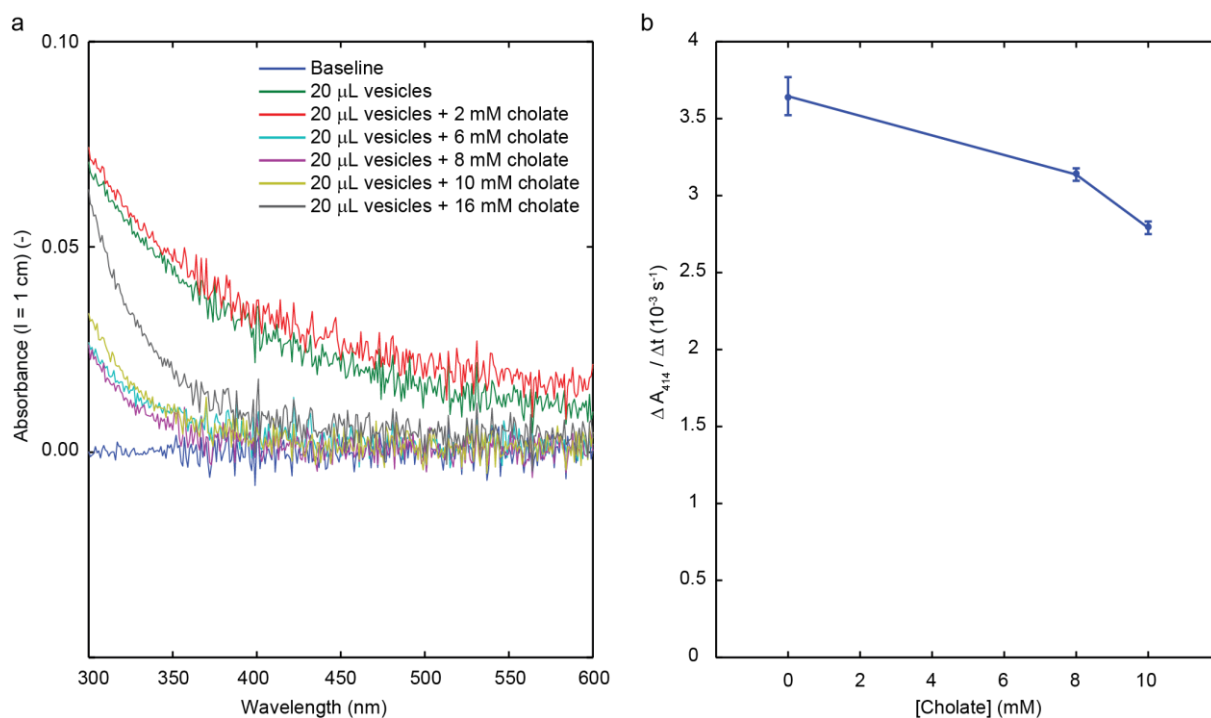

**Figure S-4.** Cholate effect on the turbidity of POPC LUV<sub>200</sub> (a) and on the activity of HRP, as measured with  $\text{ABTS}^{2-}$ ; path length: 1.0 cm (b).

For (a) 20  $\mu\text{L}$  of the main fraction (*fraction 17*) of empty POPC LUV<sub>200</sub> (2.0 mM POPC) was added to 1.0 mL buffer-2 (0.05 M  $\text{KH}_2\text{PO}_4/\text{K}_2\text{HPO}_4$ ). “20  $\mu\text{L}$  vesicles” added to 1.0 mL means that  $[\text{POPC}] = 20 \mu\text{M}$ . Therefore, the molar ratios of cholate to POPC in the experiments were 0, 100 (2 mM cholate), 300 (6 mM cholate), 400 (8 mM cholate), 500 (10 mM cholate), and 800 (16 mM cholate), respectively.

## Calibration Curves for Free HRP Measured with $\text{ABTS}^{2-}$ / $\text{H}_2\text{O}_2$ without and with Cholate

*Calibration curves with free HRP: (i) no sodium cholate, (ii) with 8.0 mM sodium cholate*

The conversion of  $\text{ABTS}^{2-}$  to the radical anion ( $\text{ABTS}^{\bullet-}$ ) was measured as the increase in  $A_{414}$  with time in quartz cuvettes with a path length of 1.0 cm ( $\epsilon_{414} = 36\,000\text{ M}^{-1}\text{ cm}^{-1}$ ).<sup>S8</sup>

(i) 100  $\mu\text{L}$  of the 10 mM  $\text{ABTS}^{2-}$  stock solution was added to an appropriate volume of buffer-2, followed by the addition of a known volume of a 136 nM HRP solution (prepared with buffer-2) and 10  $\mu\text{L}$  of the 20 mM  $\text{H}_2\text{O}_2$  stock solution to yield a total reaction volume of 1.0 mL. The final HRP concentration was between 0.7 and 5.6 nM,  $[\text{ABTS}^{2-}] = 1.0\text{ mM}$ , and  $[\text{H}_2\text{O}_2] = 0.2\text{ mM}$ . The absorption spectra were recorded at 25 °C every 15 s during the initial 150 s after  $\text{H}_2\text{O}_2$  addition, see the calibration curve in **Figure S-5a**.

(ii) 100  $\mu\text{L}$  of the 10 mM  $\text{ABTS}^{2-}$  stock solution was added to an appropriate volume of buffer-2 and 40  $\mu\text{L}$  of the 200 mM sodium cholate stock solution, followed by the addition of a known volume of a 136 nM HRP solution (prepared with buffer-2) and 10  $\mu\text{L}$  of the 20 mM  $\text{H}_2\text{O}_2$  stock solution to yield a total reaction volume of 1.0 mL. The final HRP concentration was between 0.7 and 2.8 nM,  $[\text{ABTS}^{2-}] = 1.0\text{ mM}$ ,  $[\text{cholate}] = 8.0\text{ mM}$ , and  $[\text{H}_2\text{O}_2] = 0.2\text{ mM}$ . The absorption spectra were recorded at 25 °C every 15 s during the initial 150 s after  $\text{H}_2\text{O}_2$  addition, see the calibration curve in **Figure S-5b**.

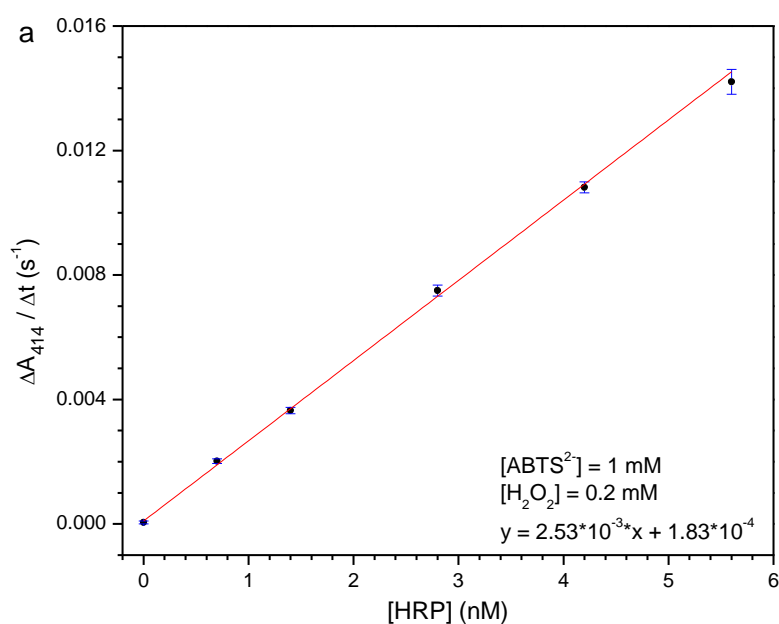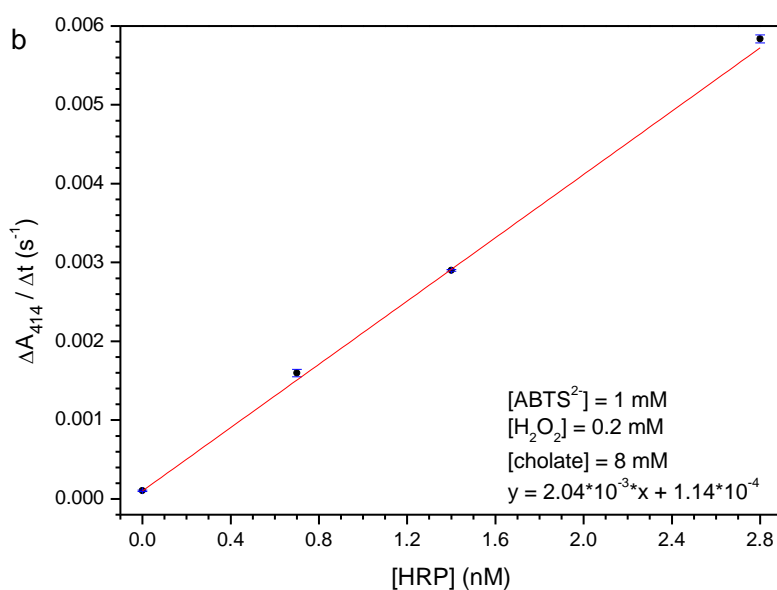

**Figure S-5.** Calibration curves for the activity of free HRP, as measured with  $\text{ABTS}^{2-}/\text{H}_2\text{O}_2$  at pH 7.0 and 25 °C. (a) Measurements without cholate, (b) measurements in the presence of 8.0 mM cholate. The activity (in  $\Delta A_{414}/\Delta t$ ,  $\text{s}^{-1}$ ) was measured for 0.7 to 5.6 nM HRP (a), or for 0.7 to 2.8 nM HRP (b).  $[\text{ABTS}^{2-}] = 1.0 \text{ mM}$  and  $[\text{H}_2\text{O}_2] = 0.2 \text{ mM}$  were fix. The error bars represent the standard deviation for  $n = 3$ . For (a):  $r^2 = 0.9988$ ; for (b):  $r^2 = 0.9997$ . Buffer solution used: 0.05 M  $\text{KH}_2\text{PO}_4/\text{K}_2\text{HPO}_4$  (buffer-2).

### Activity of *Fraction 16* Measured with $\text{ABTS}^{2-}$ / $\text{H}_2\text{O}_2$ without and with Cholate

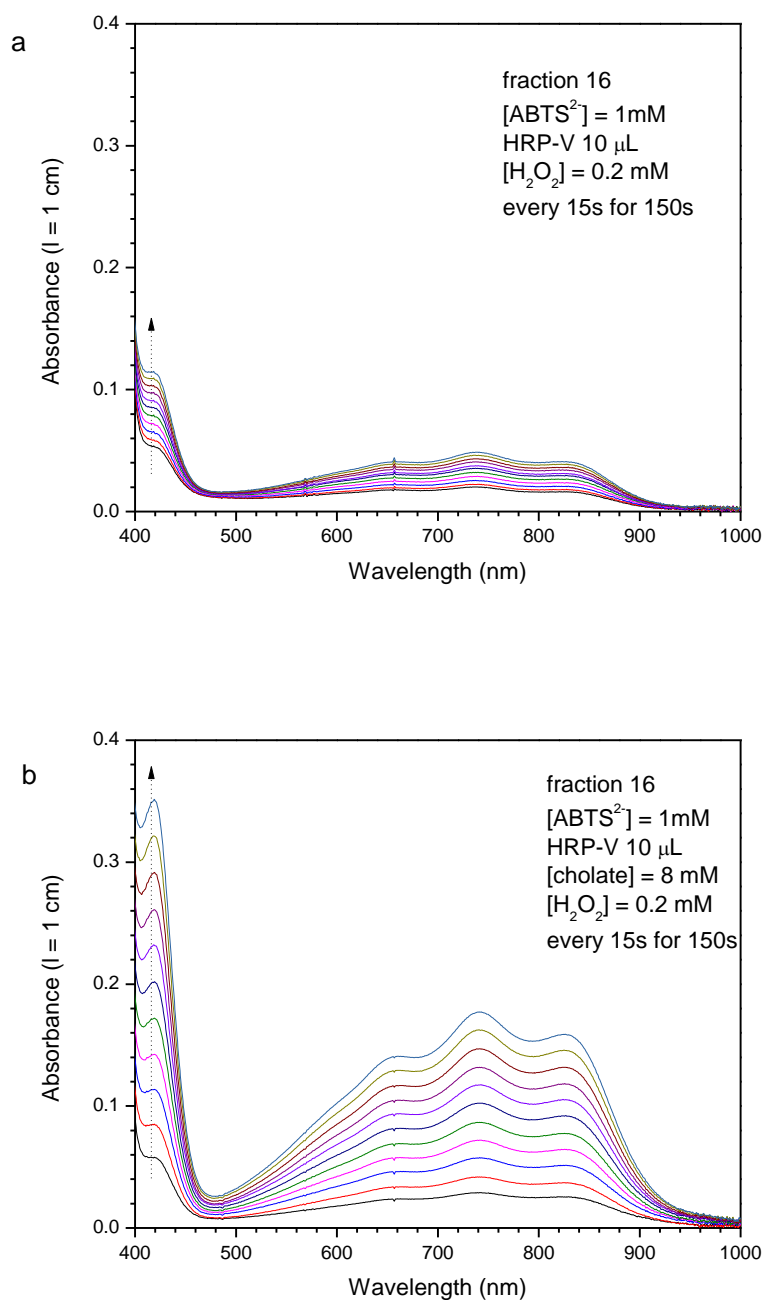

**Figure S-6.** Changes in the absorption spectrum of the  $\text{ABTS}^{2-}$  assay solution, caused by the addition of *fraction 16* (see **Figure 5**) without cholate (a) and with 8 mM cholate (b).  $[\text{ABTS}^{2-}] = 1.0\text{ mM}$ , 10  $\mu\text{L}$  vesicle *fraction 16* and  $[\text{H}_2\text{O}_2] = 0.2\text{ mM}$  at pH 7.0 and 25 °C. The spectrum was recorded every 15 s during the initial 2.5 min of the reaction in a quartz cuvette with a path length  $l = 1\text{ cm}$ . The dashed arrow indicates the change of the absorbance at  $\lambda = 414\text{ nm}$  over time. Buffer solution used: 0.05 M  $\text{KH}_2\text{PO}_4/\text{K}_2\text{HPO}_4$  (buffer-2).

## Michaelis-Menten Kinetics of Free HRP Measured with $\text{ABTS}^{2-}$ / $\text{H}_2\text{O}_2$

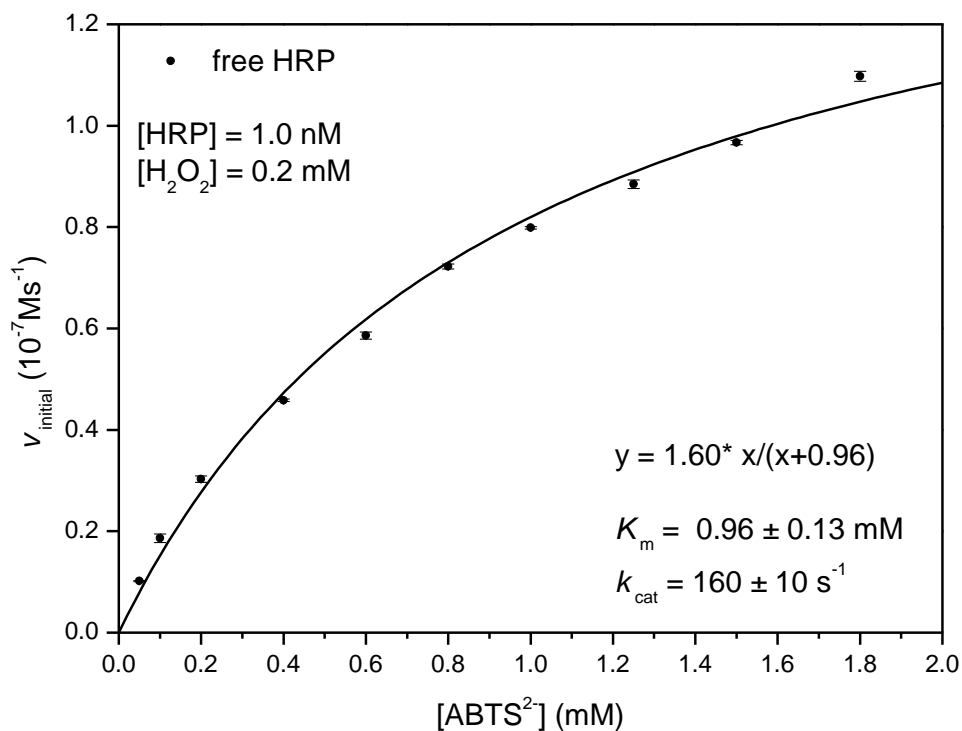

**Figure S-7.** Initial rate of  $\text{ABTS}^{2-}$  oxidation at pH 7.0 and 25 °C for 1 nM HRP, 0.2 mM  $\text{H}_2\text{O}_2$ , and varying concentrations of  $\text{ABTS}^{2-}$ . Buffer solution used: 0.05 M  $\text{KH}_2\text{PO}_4/\text{K}_2\text{HPO}_4$  (buffer-2). The data points are mean values with standard deviations ( $n = 3$ ). The data points were fitted with the Michaelis-Menten equation,  $v_{\text{in}} = ([\text{HRP}] \cdot k_{\text{cat}} \cdot [\text{ABTS}^{2-}]) / (K_M + [\text{ABTS}^{2-}])$ . The maximal velocity,  $v_{\text{max}} = [\text{HRP}] \cdot k_{\text{cat}}$  and the Michaelis constant  $K_M$  obtained from the fit were  $1.6 \pm 0.1 \text{ } 10^{-7} \text{ M s}^{-1}$  and  $0.96 \pm 0.13 \text{ mM}$ , respectively;  $r^2 = 0.9977$ .

## Calibration Curves for Free HRP Measured with PPD / H<sub>2</sub>O<sub>2</sub> without and with Cholate

*Calibration curves with free HRP: (i) no sodium cholate, (ii) with 8.0 mM sodium cholate*

The conversion of PPD to Bandrowski's base was measured as the increase in A<sub>500</sub> with time in quartz cuvettes with a path length of 1.0 cm ( $\epsilon_{500} = 1.109 \cdot 10^4 \text{ M}^{-1} \text{ cm}^{-1}$ ).<sup>S9</sup>

(i) 100  $\mu\text{L}$  of the 10 mM PPD stock solution was added to an appropriate volume of buffer-2, followed by the addition of a known volume of a 136 nM HRP solution (prepared with buffer-2) and 10  $\mu\text{L}$  of the 20 mM H<sub>2</sub>O<sub>2</sub> stock solution to yield a total reaction volume of 1.0 ml. The final HRP concentration was between 136 and 476 pM, [PPD] = 1.0 mM, and [H<sub>2</sub>O<sub>2</sub>] = 0.2 mM. The absorption spectra were recorded at 25 °C every 15 s during the initial 150 s after H<sub>2</sub>O<sub>2</sub> addition, see the calibration curve in **Figure S-8a**.

(ii) 100  $\mu\text{L}$  of the 10 mM PPD stock solution was added to an appropriate volume of buffer-2 and 40  $\mu\text{L}$  of the 200 mM sodium cholate stock solution, followed by the addition of a known volume of a 136 nM HRP solution (prepared with buffer-2) and 10  $\mu\text{L}$  of the 20 mM H<sub>2</sub>O<sub>2</sub> stock solution to yield a total reaction volume of 1.0 ml. The final HRP concentration was between 136 and 476 pM, [PPD] = 1.0 mM, [cholate] = 8.0 mM, and [H<sub>2</sub>O<sub>2</sub>] = 0.2 mM. The absorption spectra were recorded at 25 °C every 15 s during the initial 150 s after H<sub>2</sub>O<sub>2</sub> addition, see the calibration curve in **Figure S-8b**.

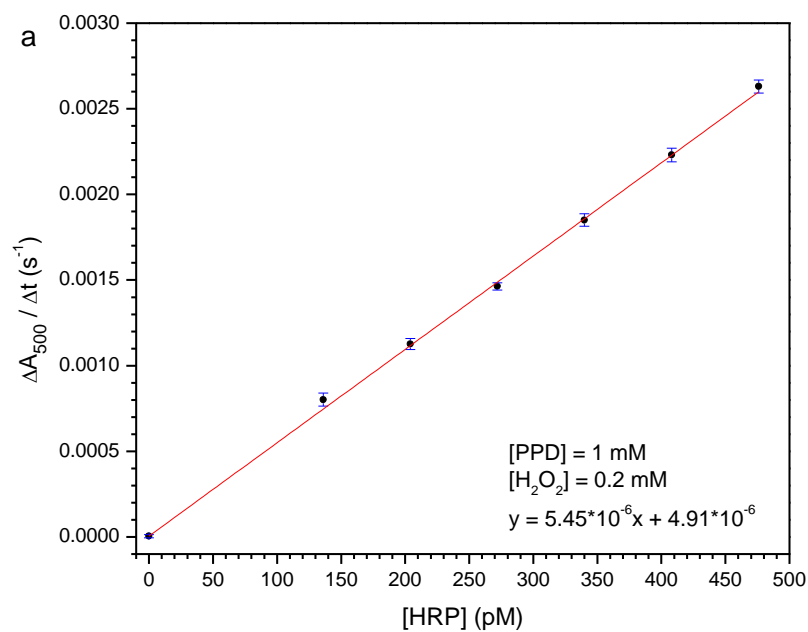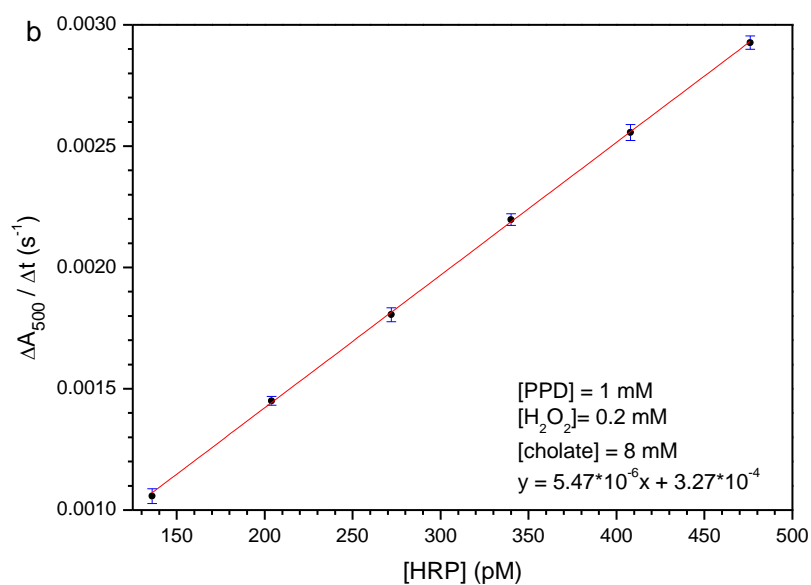

**Figure S-8.** Calibration curves for the activity of free HRP using PPD without (a) and with 8.0 mM cholate (b).  $[PPD] = 1.0 \text{ mM}$ ,  $[H_2O_2] = 0.2 \text{ mM}$  at pH 7.0 and 25 °C. Buffer solution used: 0.05 M  $KH_2PO_4/K_2HPO_4$  (buffer-2). For (a):  $r^2 = 0.9995$ ; for (b):  $r^2 = 0.9998$ .

## Activity of *Fraction 15* Measured with PPD / H<sub>2</sub>O<sub>2</sub> without and with Cholate

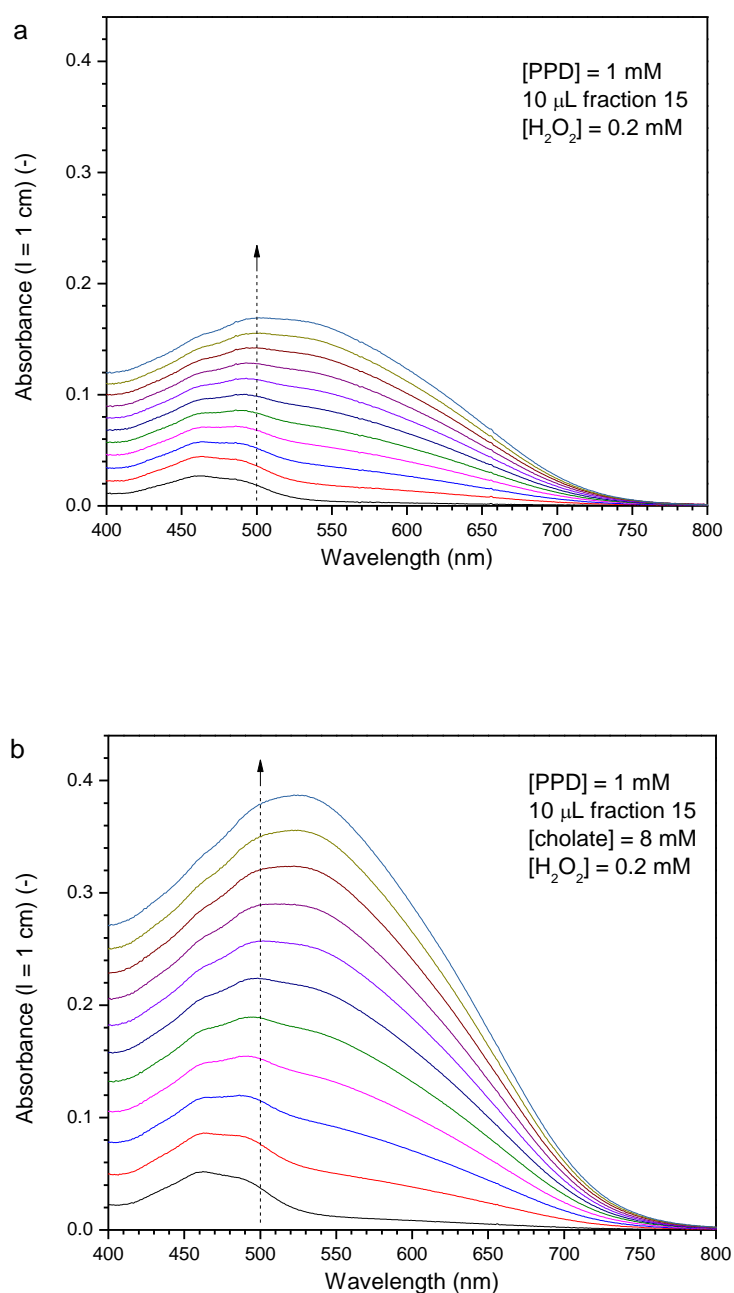

**Figure S-9.** Changes in the absorption spectrum of the PPD-assay solution, caused by the addition of *fraction 15* (see Figure 5) without (a) and with 8.0 mM cholate (b). [PPD] = 1.0 mM, 10  $\mu$ L vesicle *fraction 15* and [H<sub>2</sub>O<sub>2</sub>] = 0.2 mM at pH 7.0 and 25 °C. The spectrum was recorded every 15 s during the initial 2.5 min of the reaction in a quartz cuvette with a path length of 1 cm. The dashed arrows indicate the changes in absorbance at  $\lambda = 500$  nm over time. Buffer solution used: 0.05 M KH<sub>2</sub>PO<sub>4</sub>/K<sub>2</sub>HPO<sub>4</sub> (buffer-2).

## Suggested Mechanism for the Formation of Bandrowski's Base from PPD and H<sub>2</sub>O<sub>2</sub>

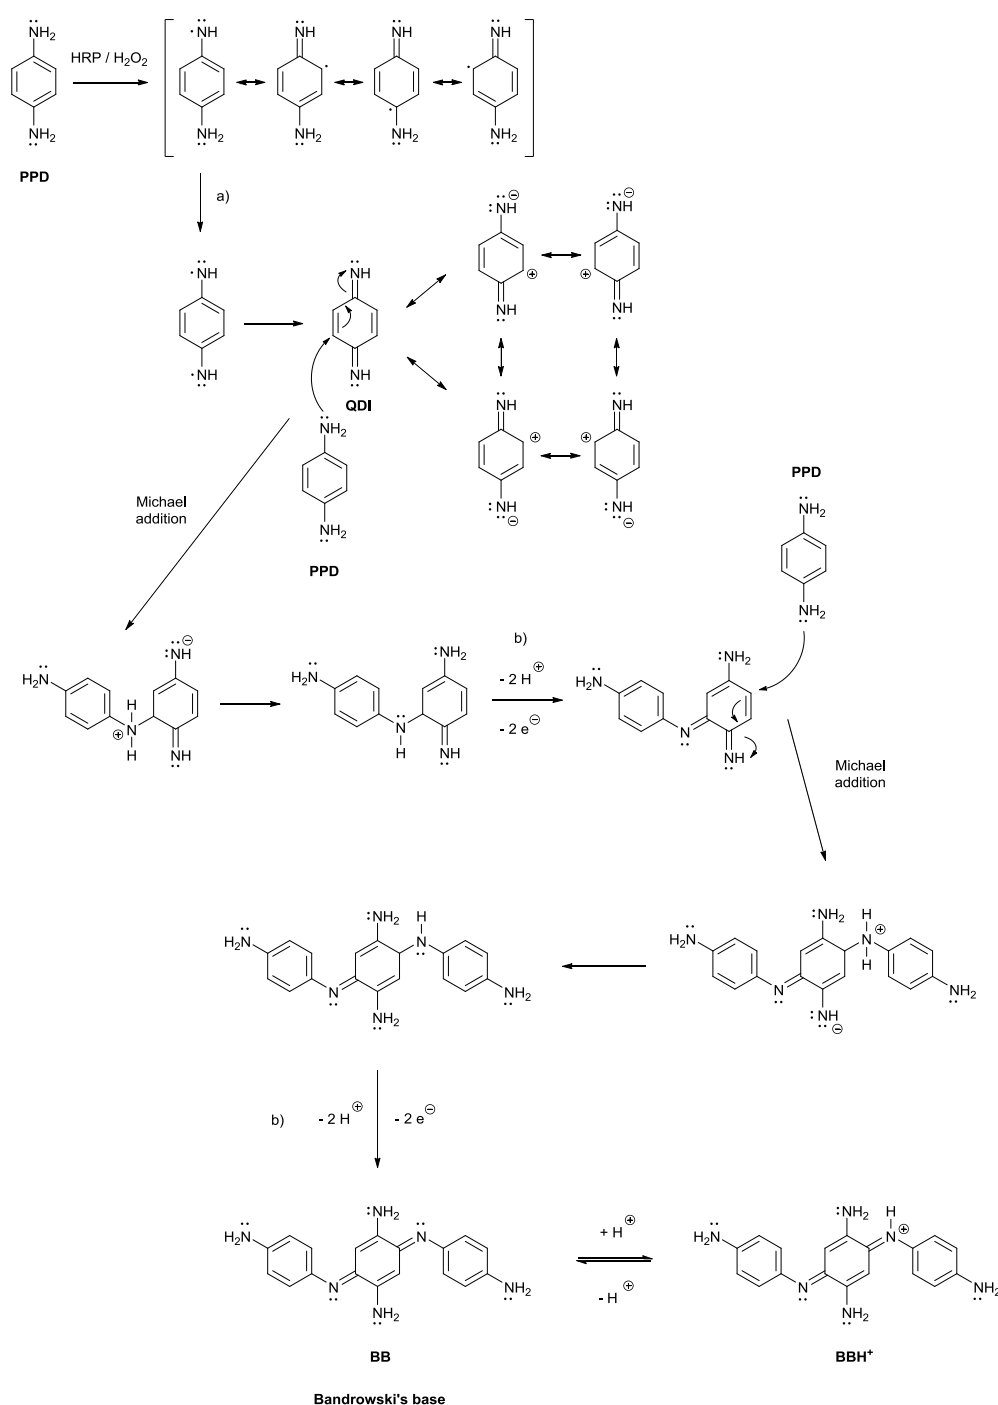

**Scheme S-1.** Suggested mechanism for the formation of Bandrowski's base from 3 molecules of PPD in the presence of H<sub>2</sub>O<sub>2</sub> with HRP as catalyst. a): disproportionation or with involvement of HRP; b) with H<sub>2</sub>O<sub>2</sub> or with redox equilibria involving PPD<sup>•</sup>. See also the work of Sousa *et al.* (2013)<sup>S10</sup> with laccase/O<sub>2</sub>, and Corbett's previous detailed studies on the non-enzymatic formation of Bandrowski's base from PPD.<sup>S9, S11</sup> **PPD:** *p*-phenylenediamine,  $pK_a(\text{PPDH}^+) \approx 6.1-6.4$ .<sup>S9, S12, S13</sup> **QDI:** quinonediimine,  $pK_a(\text{QDIH}^+) = 5.75$ .<sup>S14</sup> **Bandrowski's base:**  $pK_a(\text{BBH}^+) \approx 7.4$ <sup>S9</sup>

## MS Support for the Formation of Bandrowski's Base from PPD and H<sub>2</sub>O<sub>2</sub>

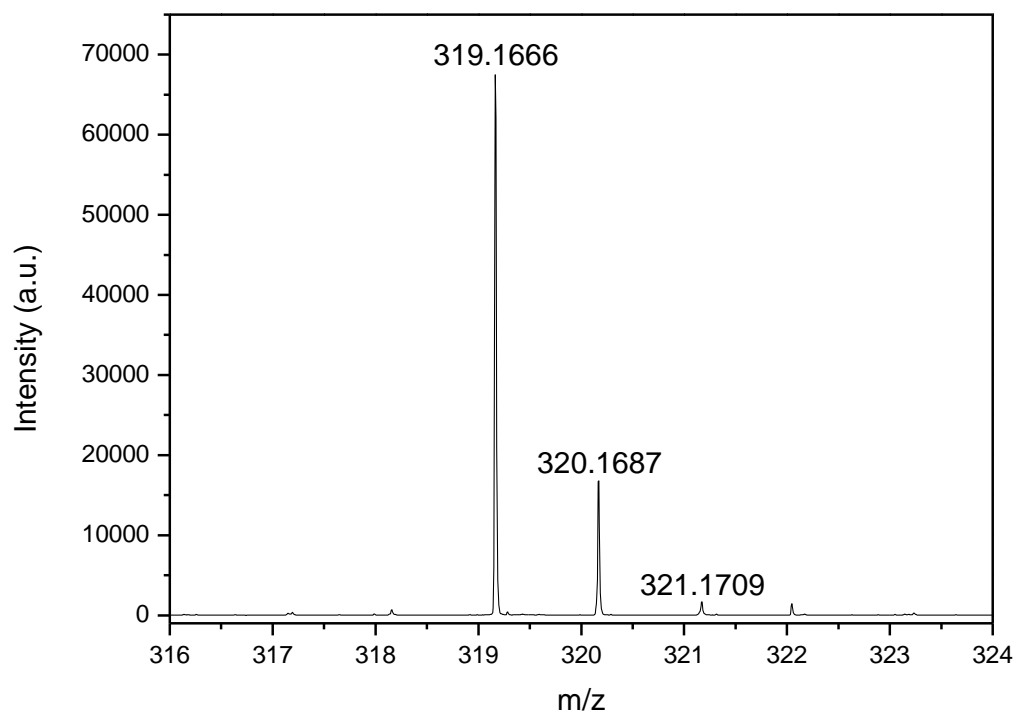

**Figure S-10.** Electrospray ionization mass spectrometry analysis of the extracted reaction products. For details, see Junker et al. (2014).<sup>S15</sup>

After a reaction time of 24 h at room temperature ([PPD] = 1.5 mM, [HRP] = 30 pM, [H<sub>2</sub>O<sub>2</sub>] = 80 μM) in buffer-1 (0.1 M NaH<sub>2</sub>PO<sub>4</sub>/Na<sub>2</sub>HPO<sub>4</sub>). For the extraction, the reaction solution was treated with *t*-butylmethylether (MTBE): 100 μL reaction solution, 400 μL MTBE.

Monoprotonated form of Bandrowski's base, BBH<sup>+</sup>, M(C<sub>18</sub>H<sub>19</sub>N<sub>6</sub>)<sup>+</sup>; m/z = 319.1666 (found); 319.1671 (theoretical value).

## HRP Activity Measurements of *Fractions 30-45* (Free HRP) with $\text{ABTS}^{2-}$

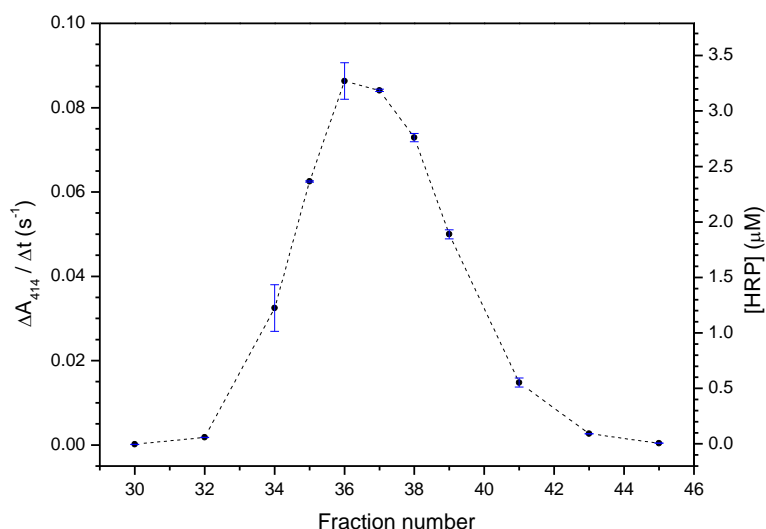

**Figure S-11.** Analysis of the fractions 30-45 (see **Figure 5**) for HRP activity by using the  $\text{ABTS}^{2-}$  assay. The y-axis on the left hand side is the measured increase in  $A_{414}$  due to the formation of  $\text{ABTS}^{\bullet-}$  ( $l = 1 \text{ cm}$ ); the axis on the right hand side refers to the HRP concentration in the fraction; fraction volume: 0.78 mL.

Applied onto the Sepharsoe 4B column: 16 nmol HRP; n.d.: not determined; est.: estimated

| Fraction number | [HRP] ( $\mu\text{M}$ ) | n(HRP) (pmol)       | Fraction number | [HRP] ( $\mu\text{M}$ ) | n(HRP) (pmol)                     |
|-----------------|-------------------------|---------------------|-----------------|-------------------------|-----------------------------------|
| 30              | 0                       | 0                   | 39              | $1.905 \pm 0.001$       | 1486                              |
| 31              | n.d.                    | est.: $\approx 25$  | 40              | n.d.                    | est.: $\approx 540$               |
| 32              | 0.064                   | 50                  | 41              | $0.514 \pm 0.001$       | 401                               |
| 33              | n.d.                    | est.: $\approx 450$ | 42              | n.d.                    | est.: $\approx 330$               |
| 34              | $1.212 \pm 0.006$       | 945                 | 43              | 0.098                   | 76                                |
| 35              | $2.402 \pm 0.000$       | 1874                | 44              | n.d.                    | est.: $\approx 30$                |
| 36              | $3.272 \pm 0.004$       | 2552                | 45              | 0.010                   | 8                                 |
| 37              | $3.184 \pm 0.000$       | 2483                |                 |                         |                                   |
| 38              | $2.742 \pm 0.001$       | 2139                | <b>Total</b>    | —                       | <b><math>\approx 13400</math></b> |

# Control Measurements of “Empty” POPC LUV<sub>200</sub> with ABTS<sup>2-</sup> / H<sub>2</sub>O<sub>2</sub>

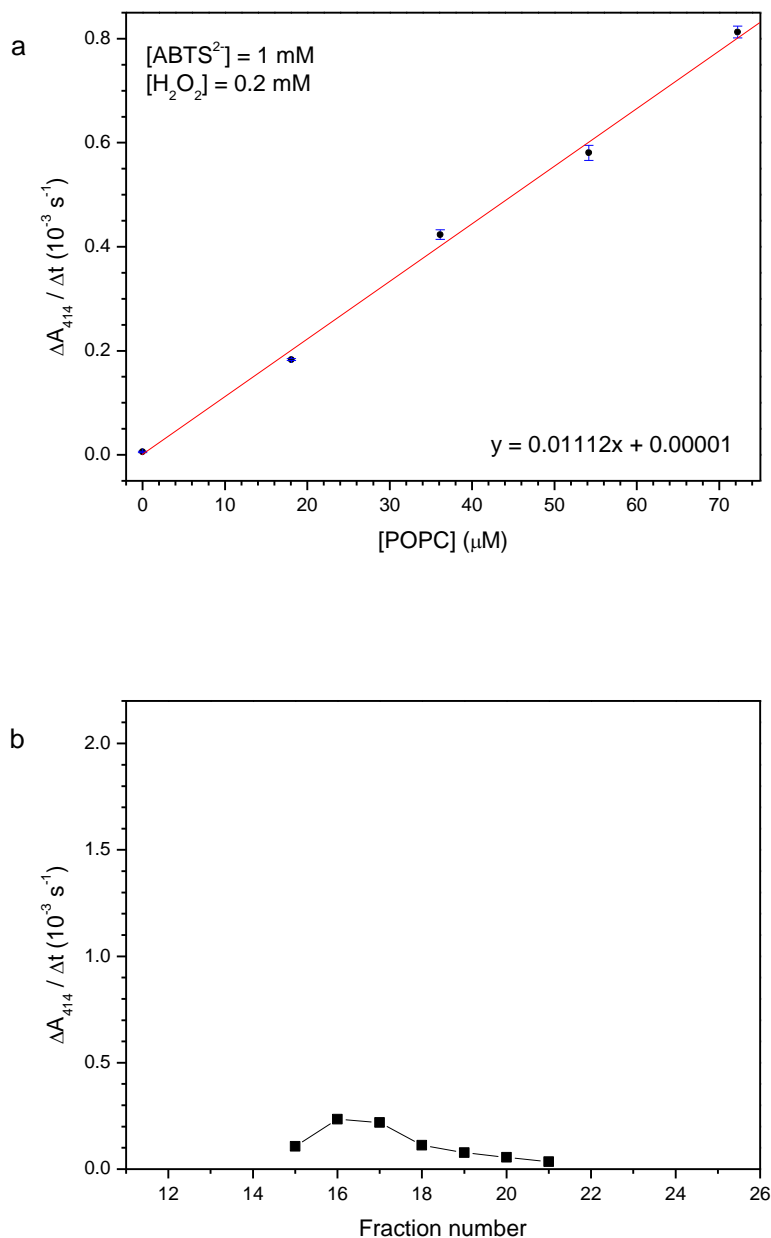

**Figure S-12.** Control measurements with “empty” POPC vesicles. (a): Effect of “empty” POPC vesicles on the stability of ABTS<sup>2-</sup>. “Empty” POPC LUV<sub>200</sub> vesicles were prepared in the same way as described for the HRP-encapsulating vesicles, but without using HRP. (b): The vesicles were then run through a Sepharose 4B column (l = 35 cm; d = 1.1 cm; applied volume: 0.5 mL 20 mM POPC). The “activities” of the vesicle fractions were measured with ABTS<sup>2-</sup> and H<sub>2</sub>O<sub>2</sub> as substrates in the same way as described for the vesicle fractions with the HRP-containing vesicles;  $r^2 = 0.9939$ .

### Control Measurements of “Empty” POPC LUV<sub>200</sub> with PPD / H<sub>2</sub>O<sub>2</sub>

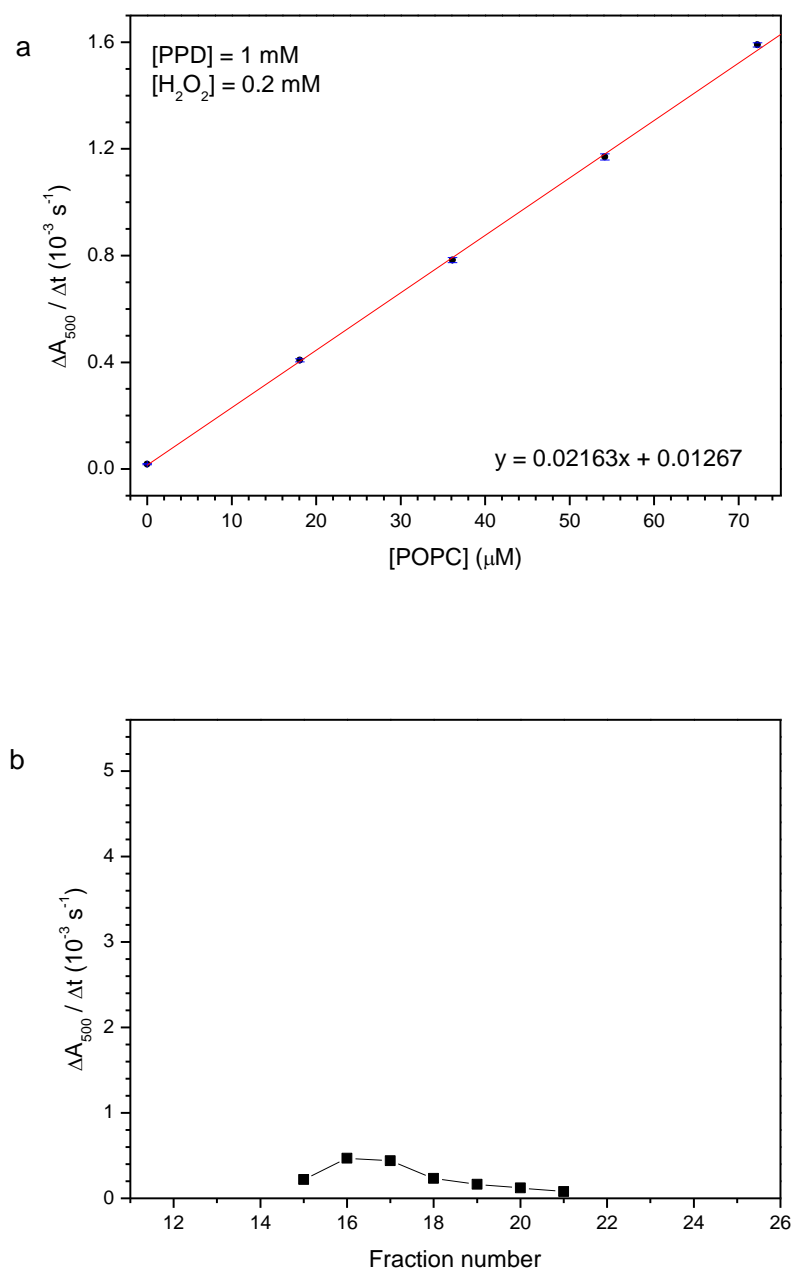

**Figure S-13.** Control measurements with “empty” POPC vesicles. (a): Effect of “empty” POPC vesicles on the stability of PPD. Effect of “empty” POPC vesicles on the stability of PPD. “Empty” POPC LUV<sub>200</sub> vesicles were prepared in the same way as described for the HRP-encapsulating vesicles, but without using HRP. (b): The vesicles were then run through a Sepharose 4B column (l = 35 cm; d = 1.1 cm; applied volume: 0.5 mL 20 mM POPC). The “activities” of the vesicle fractions were measured with PPD and H<sub>2</sub>O<sub>2</sub> as substrates in the same way as described for the vesicle fractions with the HRP-containing vesicles;  $r^2 = 0.9995$ .

## Quantification of POPC and HRP in Each Vesicle Fraction

**Table S-1.** Quantification of POPC and active HRP in each vesicle fraction, as obtained by chromatographic separation of HRP-encapsulating LUV<sub>200</sub> from free HRP, see **Figure 5** (fractions 15-21). A volume of 0.5 mL of the extruded vesicle suspension (20 mM POPC, 31  $\mu$ M HRP) was applied onto the Sepharose 4B column ( $l = 35$  cm;  $d = 1.1$  cm). For the HRP activity measurements, 10  $\mu$ L volumes of the vesicle fractions (0.78 mL each) were added to 1.0 mL of the assay solutions. The calibration curves used are the ones in **Figure S-3** (POPC), in **Figure S-5b** (ABTS<sup>2-</sup>), and in **Figure S-8b** (PPD), see EXPERIMENTAL SECTION for details.

| Fraction<br>number | Stewart assay | ABTS <sup>2-</sup> assay     |         | PPD assay                    |         |
|--------------------|---------------|------------------------------|---------|------------------------------|---------|
|                    | n(POPC)       | $\Delta A_{414}/\Delta t$    | n (HRP) | $\Delta A_{500}/\Delta t$    | n (HRP) |
|                    | (nmol)        | ( $10^{-3} \text{ s}^{-1}$ ) | (pmol)  | ( $10^{-3} \text{ s}^{-1}$ ) | (pmol)  |
| 15                 | 771           | 0.76                         | 24.68   | 1.98                         | 23.56   |
| 16                 | 1685          | 2.00                         | 72.11   | 5.30                         | 70.89   |
| 17                 | 1575          | 1.65                         | 58.73   | 4.37                         | 57.63   |
| 18                 | 809           | 0.83                         | 27.17   | 2.17                         | 26.27   |
| 19                 | 554           | 0.41                         | 11.30   | 0.97                         | 9.15    |
| 20                 | 400           | 0.31                         | 7.62    | 0.76                         | 6.21    |
| 21                 | 250           | 0.22                         | 4.12    | 0.55                         | 3.25    |
| overall            | 6044          | -                            | 205.76  | -                            | 196.96  |

POPC concentration in the different fractions: As an example, the POPC concentration in *fraction 17* was  $n(\text{POPC}) / \text{fraction volume} = 1575 \text{ nmol} / 0.78 \text{ mL} = 2.0 \text{ mM}$ .

The determined total amounts of POPC and HRP in the vesicle fractions were  $\approx 6 \mu\text{mol}$  (6044 nmol) and  $\approx 200 \text{ pmol}$ , respectively.

Applied onto the column under the assumption that no POPC or HRP was lost during extrusion:  $n(\text{POPC}) = 0.5 \cdot 10^{-3} \text{ L} \times 20 \cdot 10^{-3} \text{ mol L}^{-1} = 1.0 \cdot 10^{-5} \text{ mol} = 10 \mu\text{mol}$ ;  $n(\text{HRP}) = 0.5 \cdot 10^{-3} \text{ L} \times 31 \cdot 10^{-6} \text{ mol L}^{-1} = 1.55 \cdot 10^{-8} \text{ mol} \approx 16 \text{ nmol}$ .

## DLS Measurements of Vesicle Fractions

**Table S-2.** DLS measurements of vesicle *fraction 16* and of the pooled vesicle fractions (15-21), see **Figure 5**). The measurements were performed at 21 °C. Each sample was measured three times with five sub-runs. The hydrodynamic diameter ( $D_h$ ), as Z-average, and the polydispersity (PDI) are average values and standard deviations of three measurements (in bold).

| Sample                                  | Z-average (nm)    | PDI (-)           |
|-----------------------------------------|-------------------|-------------------|
| HRP vesicles, <i>fraction 16</i> (1:10) | 176.4             | 0.091             |
|                                         | 180.0             | 0.057             |
|                                         | 184.1             | 0.045             |
|                                         | <b>180.2±3.9</b>  | <b>0.064±0.02</b> |
| HRP vesicles, <i>fraction 16</i> (1:20) | 176.4             | 0.081             |
|                                         | 182.9             | 0.048             |
|                                         | 183.4             | 0.103             |
|                                         | <b>180.9±3.9</b>  | <b>0.077±0.03</b> |
| HRP vesicles, pooled fractions (1:2)    | 176.2             | 0.092             |
|                                         | 180.5             | 0.088             |
|                                         | 180.8             | 0.109             |
|                                         | <b>179.2±2.6</b>  | <b>0.096±0.01</b> |
| HRP vesicles, pooled fractions (1:4)    | 182.1             | 0.091             |
|                                         | 181.0             | 0.087             |
|                                         | 181.3             | 0.109             |
|                                         | <b>181.5±0.57</b> | <b>0.096±0.01</b> |

The size stability of HRP-encapsulating POPC LUV<sub>200</sub> was determined by DLS measurements of a vesicle fraction which was stored for 28 days at 4 °C. For these measurements, a separate preparation of HRP-encapsulating vesicles was carried out. The vesicle fraction was analyzed immediately after size exclusion chromatography and yielded a z-average (hydrodynamic diameter) of 190.4±1.3 nm with a PDI of 0.088±0.005. Upon storage at 4 °C for 13, 16, 23, and 28 days, the values were 187.8±1.6 nm (0.114±0.031), 189.0±0.6 nm (0.126±0.022); and 191.2±0.6 nm (0.136±0.017), respectively.

### Simulation of the Uptake of PPD by POPC LUV<sub>200</sub>

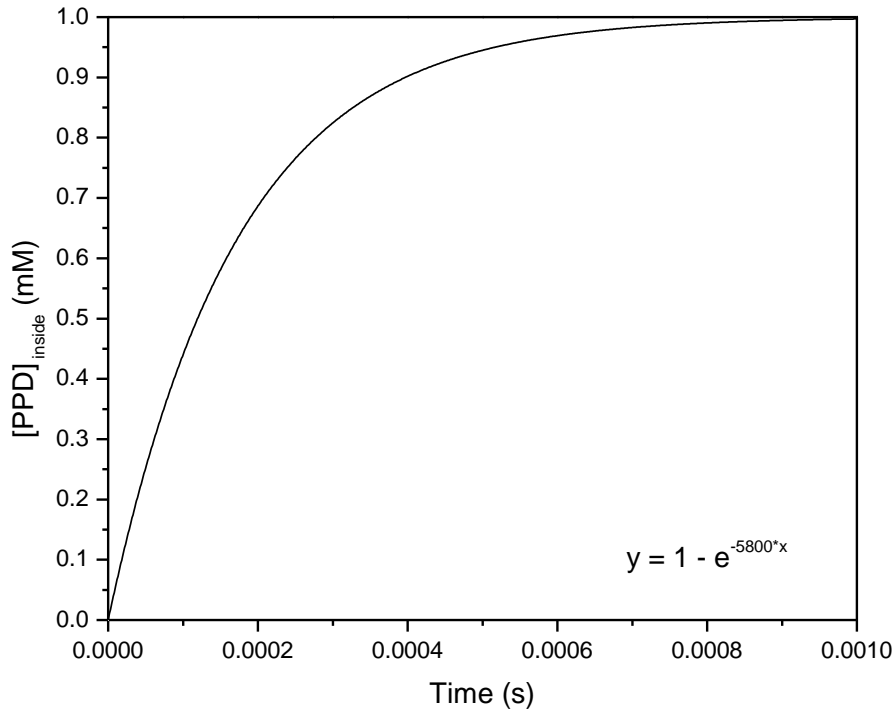

**Figure S-14.** Simulation of the time-dependent uptake of PPD by POPC LUV<sub>200</sub>.

For the simulation, Fick's first law was considered:  $J(t) = P \cdot \Delta[\text{PPD}(t)]$ , with  $J(t)$  being the flux of PPD across the POPC bilayer at time  $t$ ;  $\Delta[\text{PPD}(t)]$  being the difference in the molar PPD concentrations outside and inside the vesicles at time  $t$ ; and  $P$  being the permeability coefficient for PPD and the POPC bilayer. Assuming first order kinetics, the concentration of PPD inside the vesicles at time  $t$ ,  $[\text{PPD}]_{\text{inside}}(t)$ , is <sup>S16, S17</sup>

$$[\text{PPD}]_{\text{inside}}(t) = [\text{PPD}]_{\text{outside}}(0) (1 - e^{-k \cdot t})$$

with  $[\text{PPD}]_{\text{outside}}(0)$  being the PPD concentration in the bulk solution at  $t = 0$ ; and  $k$  being the first order rate constant for the permeability of PPD.

The correlation between  $P$  and  $k$  is as follows: <sup>S18</sup>

$$k = 3P/R$$

with  $R$  being the radius of the vesicles.

The simulation was made with  $[\text{PPD}]_{\text{outside}}(0) = 1.0 \text{ mM}$ ,  $R = 90 \text{ nm} = 9 \cdot 10^{-6} \text{ cm}$  (the determined radius of the LUV<sub>200</sub>), and  $P = 1.74 \cdot 10^{-2} \text{ cm s}^{-1}$ .

## Another Preparation of a HRP-encapsulating POPC LUV<sub>200</sub> Suspension

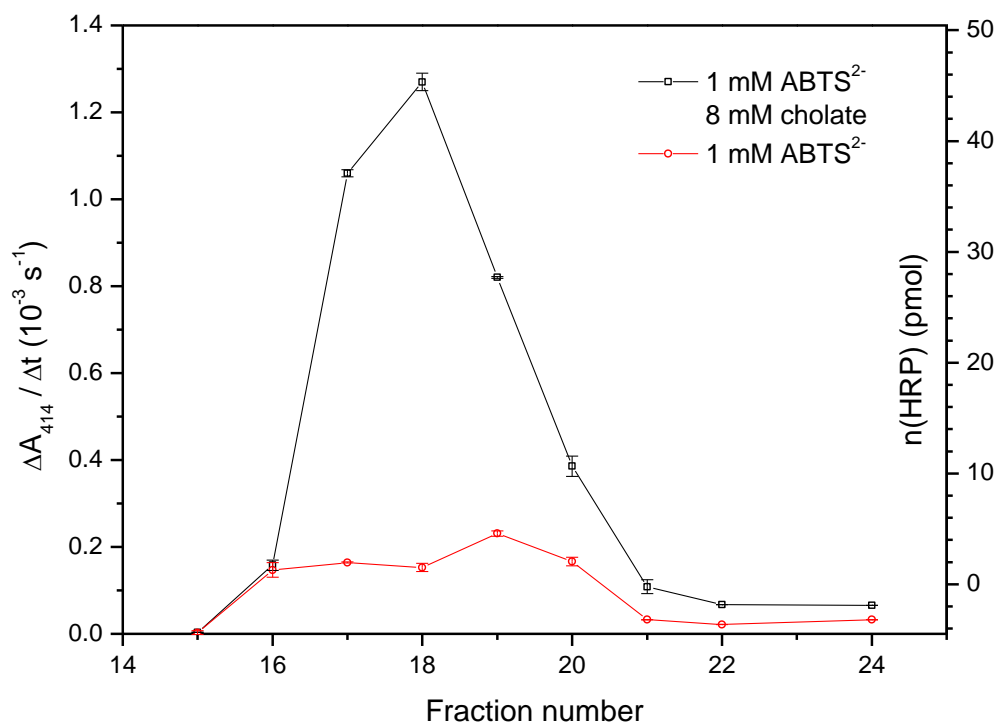

**Figure S-15.** Second preparation of HRP-encapsulating POPC LUV<sub>200</sub>. Chromatogram for the separation of non-entrapped HRP from HRP-encapsulating POPC LUV<sub>200</sub> by size exclusion chromatography with Sepharose 4B ( $l \approx 35$  cm;  $d = 1.1$  cm; applied volume: 0.5 mL (20 mM POPC, 31  $\mu\text{M}$  HRP); elution flow rate (buffer-2): 0.33 mL/min; fraction volume: 0.80 mL), see EXPERIMENTAL SECTION for details. The HRP activity in the vesicle fractions was measured with ABTS<sup>2-</sup> without (black, open squares) and with cholate (8.0 mM, red, open circles); the y-axis on the left hand side is the increase in  $A_{414}$  per s, caused by the addition of 10  $\mu\text{L}$  of the fraction to 1 mL of the assay solution ( $l = 1$  cm); the axis on the right hand side refers to the calculated amount of HRP for the measurements carried out in the presence of 8.0 mM cholate and taking into account the calibration curve in **Figure S-5b** (for ABTS<sup>2-</sup>). Details for *fractions 17, 18, and 20* are given in **Table S-3**.

**Table S-3.** Results from the analysis of *fractions 17, 18, and 20* of the second preparation of HRP-encapsulating LUV<sub>200</sub>, see the chromatogram in **Figure S-15**. The POPC concentration was determined with the Stewart assay.<sup>S4, S5</sup>

| Fraction number | [POPC] (mM) | Number of vesicles, N <sub>ves</sub> | [vesicle] (nM) | ABTS assay    |                                                       |
|-----------------|-------------|--------------------------------------|----------------|---------------|-------------------------------------------------------|
|                 |             |                                      |                | n(HRP) (pmol) | Number of HRP molecules per vesicle, N <sub>HRP</sub> |
|                 |             |                                      |                |               |                                                       |
| 17              | 2.32        | 4.02·10 <sup>12</sup>                | 8.35           | 37.10         | 6                                                     |
| 18              | 2.15        | 3.73·10 <sup>12</sup>                | 7.73           | 45.33         | 7                                                     |
| 20              | 0.71        | 1.23·10 <sup>12</sup>                | 2.55           | 10.65         | 5                                                     |

For *fraction 18*:

$$[\text{HRP}]_{\text{vesicle}} = n(\text{HRP}) / (V_{\text{ves}} \cdot N_{\text{ves}}) = 45.33 \cdot 10^{-12} \text{ mol} / (2.88 \cdot 10^{-18} \text{ L} \cdot 3.73 \cdot 10^{12}) = 4.2 \cdot 10^{-6} \text{ M}$$

## Michaelis-Menten Kinetics of HRP Inside POPC LUV<sub>200</sub> Measured with PPD / H<sub>2</sub>O<sub>2</sub>

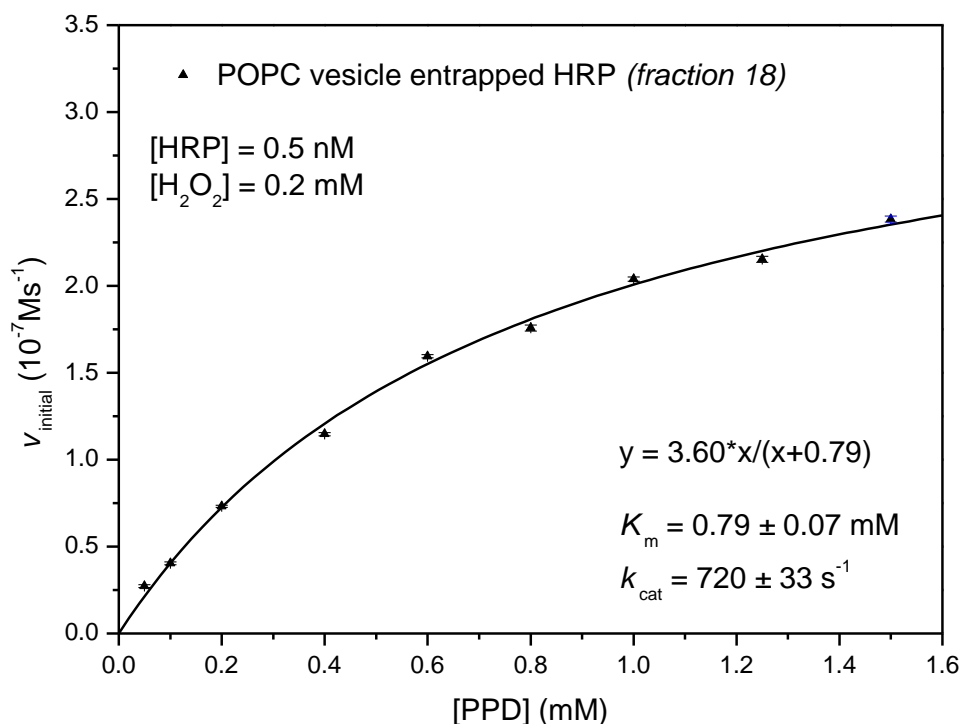

**Figure S-16.** Activity measurements with HRP-encapsulating POPC LUV<sub>200</sub> with *p*-phenylenediamine (PPD) at 25 °C and pH = 7.0 (buffer-2), with 0.2 mM H<sub>2</sub>O<sub>2</sub> and a total HRP concentration of 0.5 nM. [HRP]<sub>vesicle</sub> = 4.2 μM, N<sub>HRP</sub> ≈ 7 (*fraction 18*), see **Table S-3**, [POPC] = 19 μM. The initial rate of product formation (Bandrowski's base) – determined from the increase in A<sub>500</sub> during the first 100 s – is plotted as a function of PPD concentration. Each data point represents the mean and standard deviation from three measurements. The data points were fit with the Michaelis-Menten equation;  $r^2 = 0.9955$ . For details, see the EXPERIMENTAL SECTION and RESULTS AND DISCUSSION.

Please note that for the conversion of the measured initial change in A<sub>500</sub> per time unit into initial velocity, it was assumed that ε<sub>500</sub> (Bandrowski's base) was the same as in bulk solution (11 090 M<sup>-1</sup>cm<sup>-1</sup>).<sup>S11</sup>

## Experiments Demonstrating the Release of Bandrowski's Base Formed Inside HRP-encapsulating POPC LUV<sub>200</sub> from the Vesicles

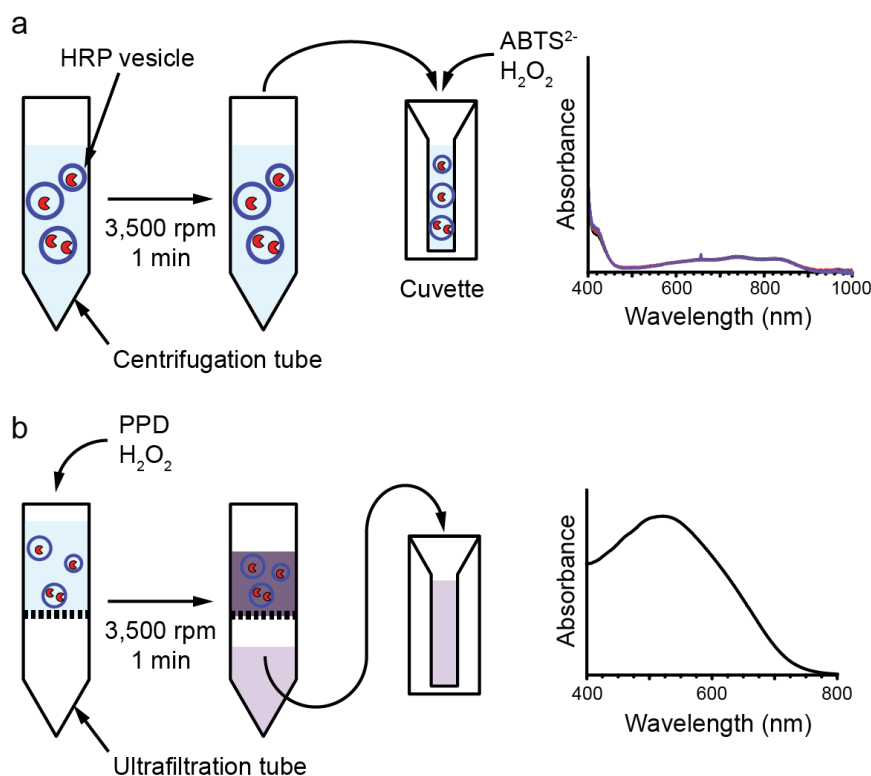

**Figure S-17.** Schematic of the experiments showing that Bandrowski's base, which was formed inside HRP-encapsulating LUV<sub>200</sub> at pH 7.0 (buffer-2), leaked out from the vesicles.

(a) HRP-encapsulating POPC LUV<sub>200</sub> were prepared (*fraction 16*, **Figure 5**, **Table 1**) and put into a centrifugation tube (100  $\mu$ L *fraction 16* + 900  $\mu$ L buffer-2) and then centrifuged with a Hermle Z 320H centrifuge at 3500 rpm for 1 min. Afterwards, 100  $\mu$ L of the vesicle suspension were added to 900  $\mu$ L of an ABTS<sup>2-</sup> assay solution containing 0.5 mM ABTS<sup>2-</sup> and 40  $\mu$ M H<sub>2</sub>O<sub>2</sub>. The UV/Vis spectrum was measured every minute for the initial 5 minutes, indicating the expected formation of small amounts of ABTS<sup>-</sup> only, see also **Figure S-6a** and **Figure S-12**. These measurements showed that centrifugation does not lead to a release of encapsulated HRP from the vesicles.

(b) 3  $\mu$ L of a HRP-encapsulating POPC LUV<sub>200</sub> suspension (*fraction 16*) were added to 1 mL PPD assay solution (0.5 mM PPD, 80  $\mu$ M H<sub>2</sub>O<sub>2</sub>, buffer-2). The vesicle suspension was then added to an ultrafiltration device (from Millipore, 100 000 cutoff), incubated for 10 min and then centrifuged for 1 min at 3500 rpm. The UV/Vis spectrum of the ultrafiltrate was measured. The intensity of the absorption band around 500 nm was similar to what was expected for the type of measurements shown in **Figure S-9**. This indicates that at least some of Bandrowski's base formed inside the vesicles leaked out from the vesicles.

## References

- (S1) Standish, M. M.; Watkins, J. C. *J. Mol. Biol.* **1965**, *13*, 238-252.
- (S2) Papahadjopoulos, D.; Kimelberg, H. K. *Prog. Surf. Sci.* **1974**, *4*, 141-232.
- (S3) Mui, B.; Chow, L.; Hope, M. J. *Methods Enzymol.* **2003**, *367*, 3-14.
- (S4) Stewart, J. C. M. *Anal Biochem.* **1980**, *104*, 10-14.
- (S5) Zuidam, J.; de Vruhe, R.; Crommelin, D. J. A. In: *Liposomes. A Practical Approach, Second Edition*; Torchilin, V.; Weissig, V., Eds.; Oxford University Press: Oxford, 2003, pp 31-78.
- (S6) According to Toyobo Enzymes (Japan), HRP shows 97 % residual activity in the presence of 0.10 % sodium cholate (= 2.32 mM), as analyzed with 4-aminoantipyrine and diethylaniline as substrates, see: <http://www.toyobousa.com/enzyme-PEO-131-301-302.html>, accessed on Sept. 07, 2016
- (S7) Treyer, M.; Walde, P.; Oberholzer, T. *Langmuir* **2002**, *18*, 1043-1050.
- (S8) Childs, R. E.; Bardsley, W. G. *Biochem. J.* **1975**, *145*, 93-103.
- (S9) Calculated from Figure 1 in Corbett, J. F. *J. Chem. Soc. B*, **1969**, 818-822.
- (S10) Sousa, A. C.; Martins, L. O.; Robalo, M. P. *Adv. Synth. Catal.* **2013**, *355*, 2908-2917.
- (S11) Corbett, J. F., *J. Soc. Cosmet. Chem.* **1972**, *23*, 683-693.
- (S12) Manoharan, R.; Dogra, S. K. *Bull. Chem. Soc. Jpn.* **1987**, *60*, 4409-4415.
- (S13) Tong, L. K. J.; Glesmann, C. *Photogr. Sci. Eng.* **1964**, *8*, 319-325.
- (S14) Corbett, J. F. *J. Chem. Soc. B*, **1969**, 213-216.
- (S15) Junker, K.; Luginbühl, S.; Schüttel, M.; Bertschi, L.; Kissner, R.; Schuler, L. D.; Rakvin, B.; Walde, P. *ACS Catal.* **2014**, *4*, 3421-3434.
- (S16) Harrigan, P.R.; Wong, K. F.; Redelmeier, T. E.; Wheeler, J. J.; Cullis, P. R. *Biochim. Biophys. Acta* **1993**, *1149*, 329-338.
- (S17) Chakrabarti, A. C.; Clark-Lewis, I.; Cullis, P. R. *Biochemistry* **1994**, *33*, 8479-8485.
- (S18) Chakrabarti, A. C.; Deamer, D. W. *Biochim. Biophys. Acta* **1992**, *1111*, 171-177.
